# Supplementary material
Source: MDPI journal article supplement (https://www.mdpi.com/2076-3905/5/2/16)
Supplement: s1 [file s1]

# Supplementary Material: Evaluation of Solid Supports for Slide- and Well-Based Recombinant Antibody Microarrays

Anna S. Gerdtsen, Linda Dexlin-Mellby, Payam Delfani, Erica Berglund, Carl A. K. Borrebaeck and Christer Wingren

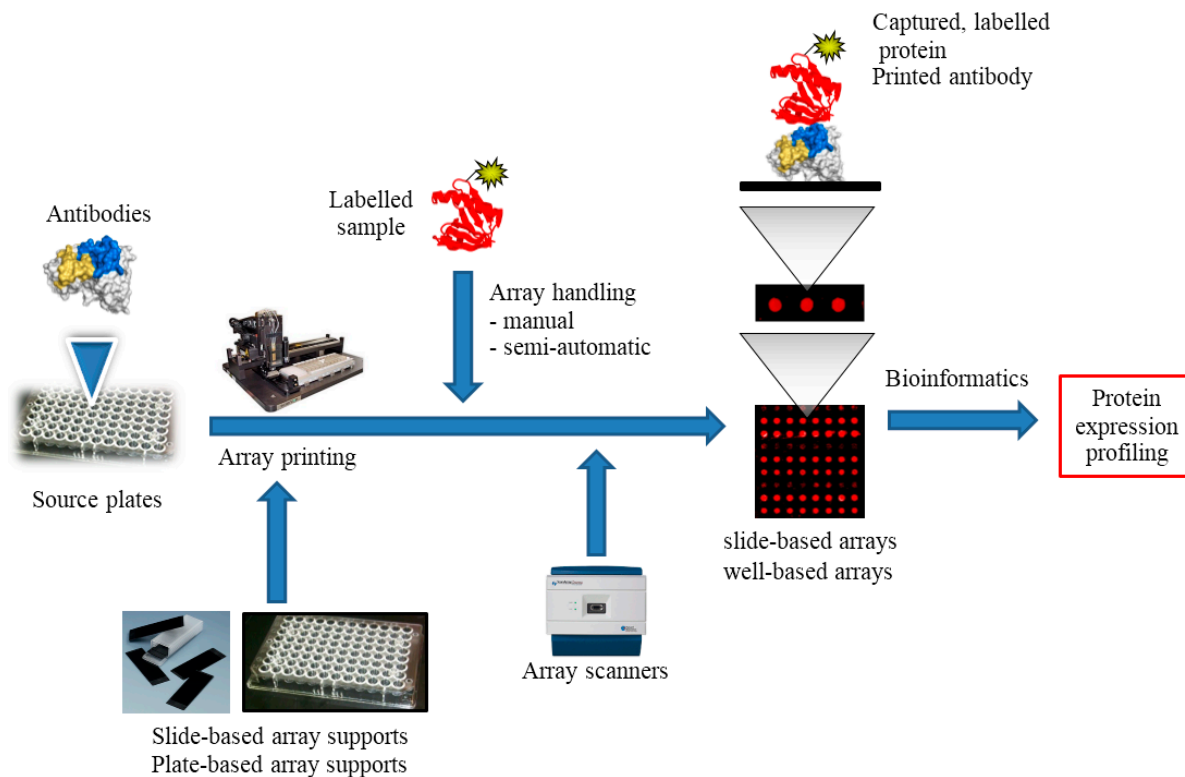

**Figure S1.** Schematic illustration of the recombinant antibody microarray technology platform, also highlighting the main technical issues addressed in the study.

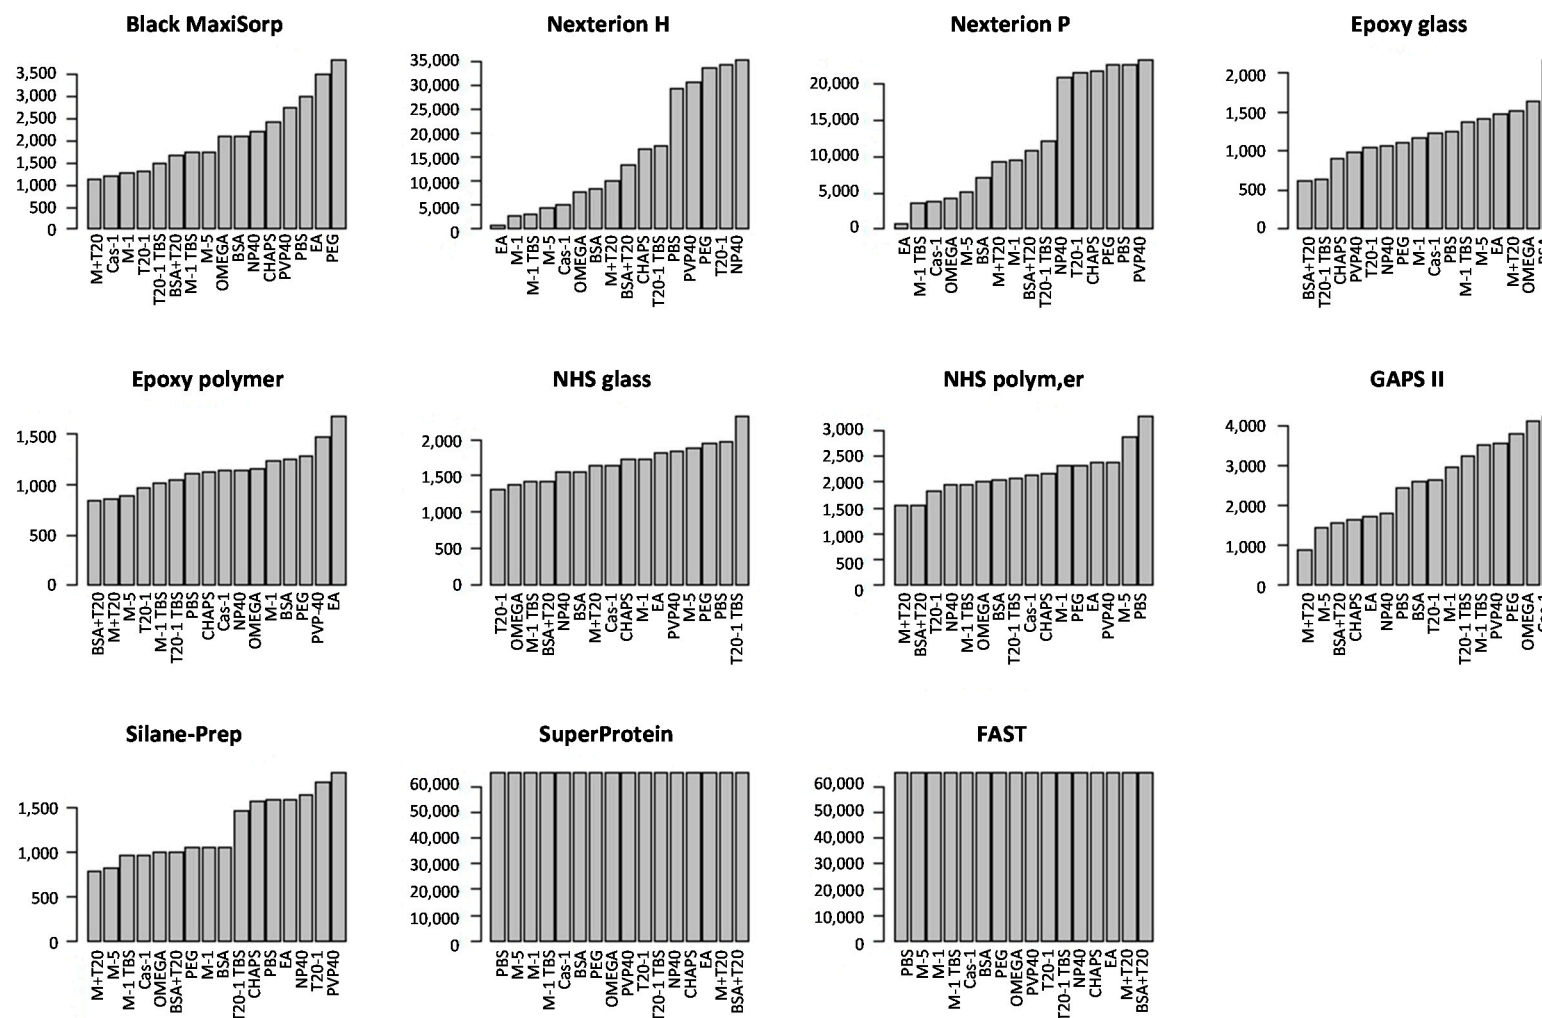

**Figure S2.** Evaluation of blocking buffers for slide-based solid supports. The slides were blocked with 16 different blocking solutions (Table S2) and then exposed to crude, directly-biotinylated serum sample, whereafter any non-specific background binding (surface fouling) was detected.

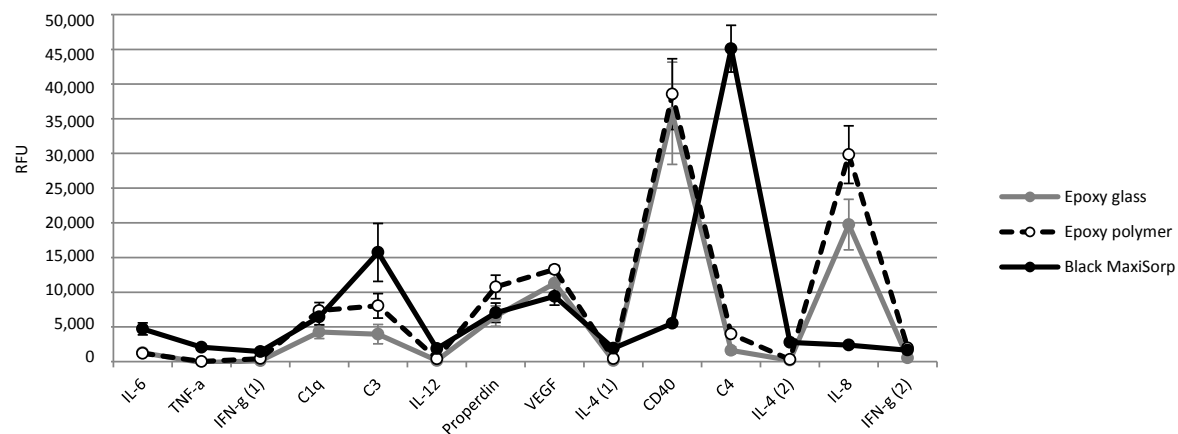

**Figure S3.** Comparison of antibody binding pattern on three different slide-based solid supports. A serum sample was profiled on a 14-plex antibody microarray printed on slide-based supports, including black MaxiSorp, epoxy polymer and epoxy glass. Quantified signals were collected from the highest possible scanner setting without any spot saturation (60% PMT gain/90% LP for black MaxiSorp slides and 50% PMT gain/90% LP for the epoxy-coated slides).

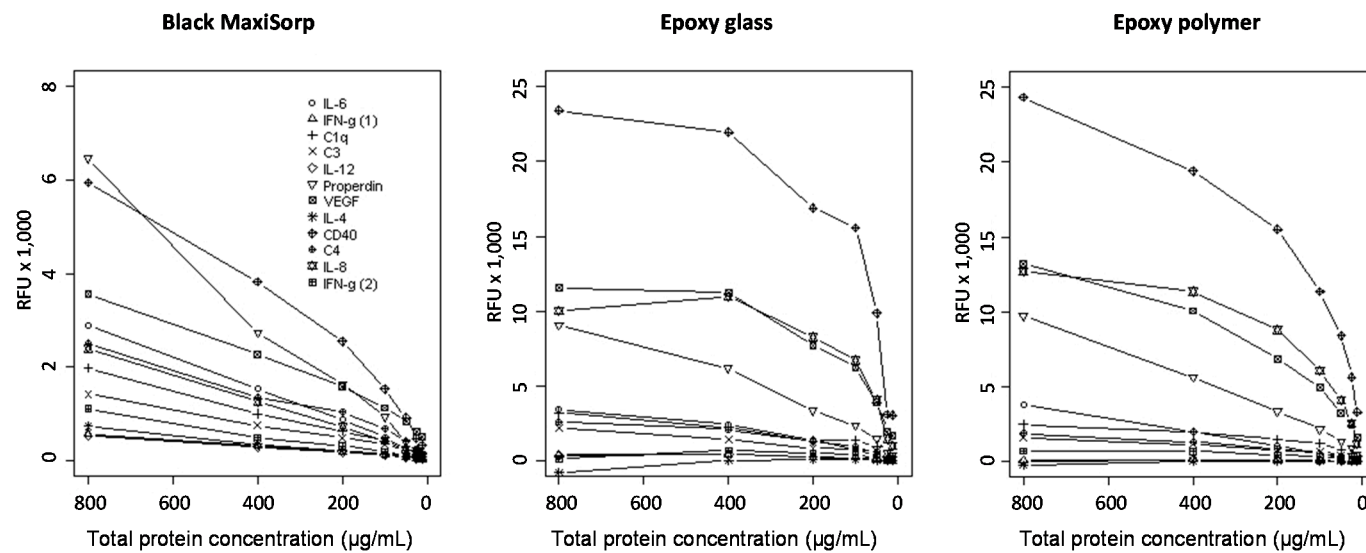

**Figure S4.** Comparison of assay sensitivity and the dynamic range of slide-based antibody microarrays. Serial dilutions of a serum sample, ranging from a total protein concentration of 12.5–800  $\mu\text{g/mL}$ , was profiled on black MaxiSorp, epoxy polymer and epoxy glass.

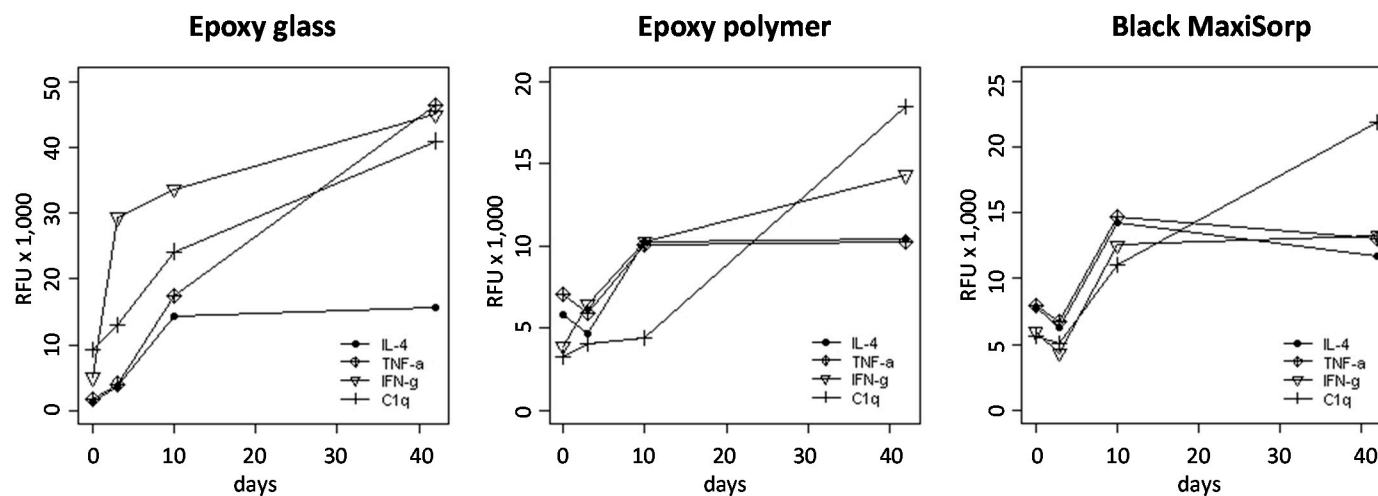

**Figure S5.** Evaluation of long-term storage on the activity of slide-based antibody microarrays. Arrays were printed on black MaxiSorp, epoxy polymer and epoxy glass slides. All antibody microarrays were printed on Day 0 and then stored dried out for 0, 3, 10 or 42 days prior to array handling (blocking, washing, sample incubation, *etc.*). The antibody activity for four representative antibodies, targeting IL-4, TNF- $\alpha$ , IFN- $\gamma$  and C1q, was assessed.

**Table S1.** Antibodies used.

| Antigen                  | No. of Antibody Clones | Antigen               | No. of Antibody Clones |
|--------------------------|------------------------|-----------------------|------------------------|
| Angiotenin               | 1                      | IL-9                  | 2                      |
| Apolipoprotein A1        | 1                      | IL-10                 | 3                      |
| Bruton's Tyrosine Kinase | 1                      | IL-11                 | 2                      |
| C1 esterase inhibitor    | 2                      | IL-12                 | 3                      |
| C1q                      | 1                      | IL-13                 | 3                      |
| C1s                      | 1                      | IL-16                 | 3                      |
| C3                       | 12                     | IL-18                 | 2                      |
| C4                       | 4                      | Integrin $\alpha$ -10 | 1                      |
| C5                       | 9                      | Integrin $\alpha$ -11 | 1                      |
| CD40                     | 2                      | LDL                   | 2                      |
| CD40 ligand              | 1                      | Leptin                | 1                      |
| Cystatin C               | 1                      | Lewis x               | 1                      |
| Factor B                 | 2                      | Lewis y               | 1                      |
| GLP-1R                   | 1                      | MCP-1                 | 2                      |
| GM-CSF                   | 1                      | MCP-3                 | 1                      |
| IFN- $\gamma$            | 2                      | MCP-4                 | 1                      |
| IgM                      | 1                      | Mucin 1               | 1                      |
| IL-1 $\alpha$            | 2                      | Procathepsin          | 1                      |
| IL-1 $\beta$             | 2                      | Properdin             | 1                      |
| IL-1ra                   | 1                      | RANTES                | 2                      |
| IL-2                     | 1                      | TGF- $\beta$          | 1                      |
| IL-3                     | 3                      | TM peptide            | 1                      |
| IL-4                     | 3                      | TNF- $\alpha$         | 1                      |
| IL-5                     | 2                      | TNF- $\beta$          | 2                      |
| IL-6                     | 3                      | VEGF                  | 2                      |
| IL-8                     | 1                      |                       |                        |

**Table S2.** Blocking agents evaluated for blocking of slide-based solid supports.

| Name                 | Blocking Agent                     | Buffer | Type      |
|----------------------|------------------------------------|--------|-----------|
| PBS                  | None                               | PBS    | Control   |
| BSA-1                | 1% ( <i>w/v</i> ) BSA              | PBS    | Protein   |
| BSA-5                | 5% ( <i>w/v</i> ) BSA              | PBS    | Protein   |
| Cas-1                | 1% ( <i>w/v</i> ) casein           | PBS    | Protein   |
| Cas-5                | 5% ( <i>w/v</i> ) casein           | PBS    | Protein   |
| M-1                  | 1% ( <i>w/v</i> ) non-fat dry milk | PBS    | Protein   |
| M-1 TBS              | 1% ( <i>w/v</i> ) non-fat dry milk | TBS    | Protein   |
| M-5                  | 5% ( <i>w/v</i> ) non-fat dry milk | PBS    | Protein   |
| M-5 TBS              | 5% ( <i>w/v</i> ) non-fat dry milk | TBS    | Protein   |
| OMEGA <sup>(a)</sup> | 1% ( <i>w/v</i> ) OMEGA            | PBS    | Polymer   |
| PEG                  | 1% ( <i>w/v</i> ) PEG2000          | PBS    | Polymer   |
| PVP40                | 1% ( <i>w/v</i> ) PVP 40           | PBS    | Polymer   |
| CHAPS <sup>(b)</sup> | 1% ( <i>w/v</i> ) CHAPS            | PBS    | Detergent |
| NP40 <sup>(c)</sup>  | 1% ( <i>v/v</i> ) NP-40            | PBS    | Detergent |
| T20-1                | 1% ( <i>v/v</i> ) Tween-20         | PBS    | Detergent |

Table S2. *Cont.*

| Name      | Blocking Agent                                | Buffer               | Type      |
|-----------|-----------------------------------------------|----------------------|-----------|
| T20-1 TBS | 1% (v/v) Tween-20                             | TBS                  | Detergent |
| TX100     | 1% (v/v) Triton-X-100                         | PBS                  | Detergent |
| BSA + T20 | 1% (w/v) BSA + 1% (v/v) Tween-20              | PBS                  | Mix       |
| M + T20   | 1% (w/v) non-fat dry milk + 1% (v/v) Tween-20 | PBS                  | Mix       |
| EA        | 25 mM ethanolamine                            | 100 mM sodium borate | Other     |

<sup>(a)</sup> OMEGA= *N*-Octanoyl-*N*-methylglucamine; <sup>(b)</sup> CHAPS= 3-[(3-Cholamidopropyl)dimethylammonio]-1-propanesulfonate hydrate; <sup>(c)</sup> NP40 = 4-Nonylphenyl poly(ethylene glycol)
